# Supplementary material
Source: PubMed Central journal article supplement (PMC3906498)
Supplement: NIHMS397895-supplement-1.pdf [file NIHMS397895-supplement-1.pdf]

## Supplementary Files

| <b>Supplementary File</b>      | <b>Title</b>                                                                        |
|--------------------------------|-------------------------------------------------------------------------------------|
| <b>Supplementary Figure 1</b>  | Photochemical properties of QAQ.                                                    |
| <b>Supplementary Figure 2</b>  | External QAQ does not block voltage-gated Na <sup>+</sup> channels.                 |
| <b>Supplementary Figure 3</b>  | Intracellular QAQ quickly blocks and unblocks Na <sup>+</sup> channels.             |
| <b>Supplementary Figure 4</b>  | QAQ photosensitizes voltage-gated Na <sup>+</sup> channels from sensory TG neurons. |
| <b>Supplementary Figure 5</b>  | QAQ photosensitizes various voltage-gated Ca <sup>2+</sup> channels.                |
| <b>Supplementary Figure 6</b>  | QAQ photosensitizes various voltage-gated K <sup>+</sup> channels.                  |
| <b>Supplementary Figure 7</b>  | QAQ does not photosensitize K <sub>ir</sub> or HCN channels.                        |
| <b>Supplementary Figure 8</b>  | QAQ does not photosensitize glutamate receptors.                                    |
| <b>Supplementary Figure 9</b>  | Neuronal survival after ATP and QAQ treatment.                                      |
| <b>Supplementary Figure 10</b> | QAQ photosensitizes second order neurons in spinal cord slices.                     |

## Supplementary Figure 1: Photochemical properties of QAQ.

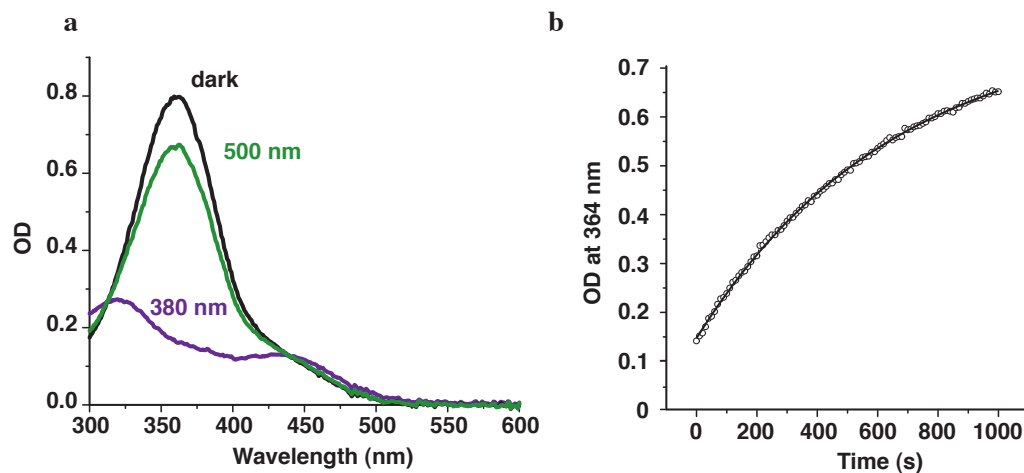

**(a)** UV-Vis spectrum of QAQ in solution (10 mM PBS, pH 7.4) either in the dark, or under illumination with 500 nm or 380 nm light. **(b)** Thermal relaxation of QAQ from *cis* to *trans* in the dark. Data was fitted using a mono-exponential decay ( $t_{1/2} = 449 \pm 5$  s).

**Supplementary Figure 2: External QAQ does not block voltage-gated Na<sup>+</sup> channels.**

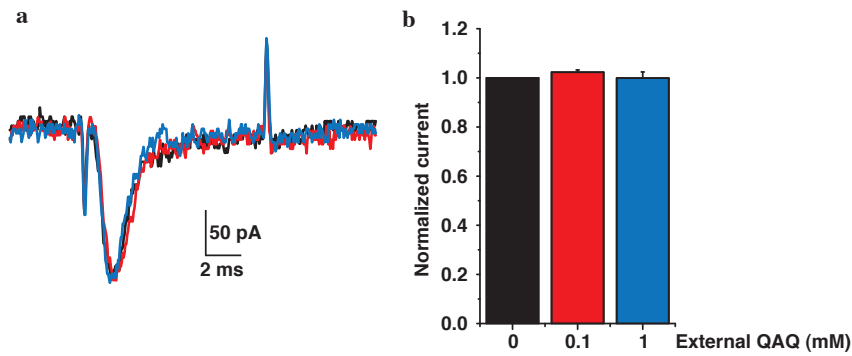

(a) Na<sup>+</sup> current recorded from an NG108-15 cell upon depolarization from -70 to -10 mV. Perfusion with QAQ 100 μM (red) or 1 mM (blue) did not alter Na<sup>+</sup> current (black). (b) Normalized current ( $0.1 \pm 2.5$  % block  $\pm$  s.e.m.,  $n = 3$  cells,  $p = 0.97$  Student t-test).

**Supplementary Figure 3: Intracellular QAQ quickly blocks and unblocks Na<sup>+</sup> channels.**

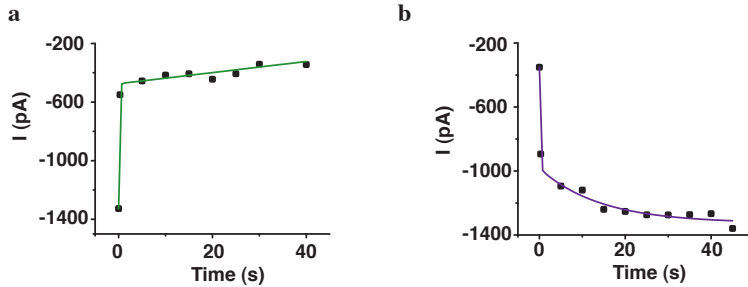

**(a)** Onset of block after switching light to 500 nm. Current was fitted with a bi-exponential decay equation. The fast process ( $t_{1/2} = 88 \pm 5$  ms,  $n = 3$  cells) reflects block of Na<sup>+</sup> channels, whereas the slow process may reflect slow inactivation of Na<sup>+</sup> channels. **(b)** Kinetics of unblock after switching light to 380 nm. Current was fitted with a bi-exponential decay equation, with  $t_{1/2} = 58 \pm 30$  ms ( $n = 3$  cells). The slow process may reflect slow recovery from inactivation of Na<sup>+</sup> channels.

**Supplementary Figure 4: QAQ photosensitizes voltage-gated Na<sup>+</sup> channels from sensory TG neurons.**

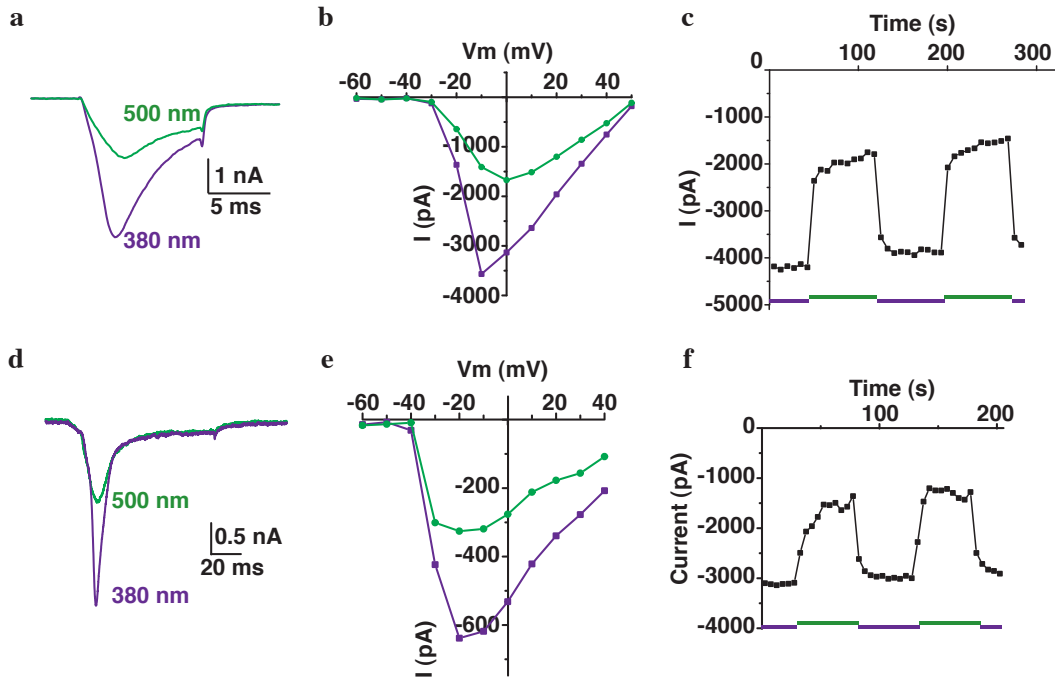

(a) Na<sup>+</sup> current recorded from a TG neuron upon depolarization from -70 to -10 mV, using 100 μM QAQ in the pipette and under both wavelengths of light ( $49.7 \pm 5.2$  % photoswitching  $\pm$  s.e.m.,  $n = 6$  cells). (b) I/V dependency of block and unblock. (c) Reversibility of block and unblock. (d) TTX-resistant Na<sup>+</sup> current recorded from a TG neuron upon depolarization from -70 to -10 mV, using 100 μM QAQ in the pipette, 0.5 μM TTX in the bath, and under both wavelengths of light ( $46.3 \pm 7.9$  % photoswitching  $\pm$  s.e.m.,  $n = 4$  cells). (e) I/V dependency of block and unblock. (f) Reversibility of block and unblock under both wavelength of light.

## Supplementary Figure 5: QAQ photosensitizes various voltage-gated $\text{Ca}^{2+}$ channels.

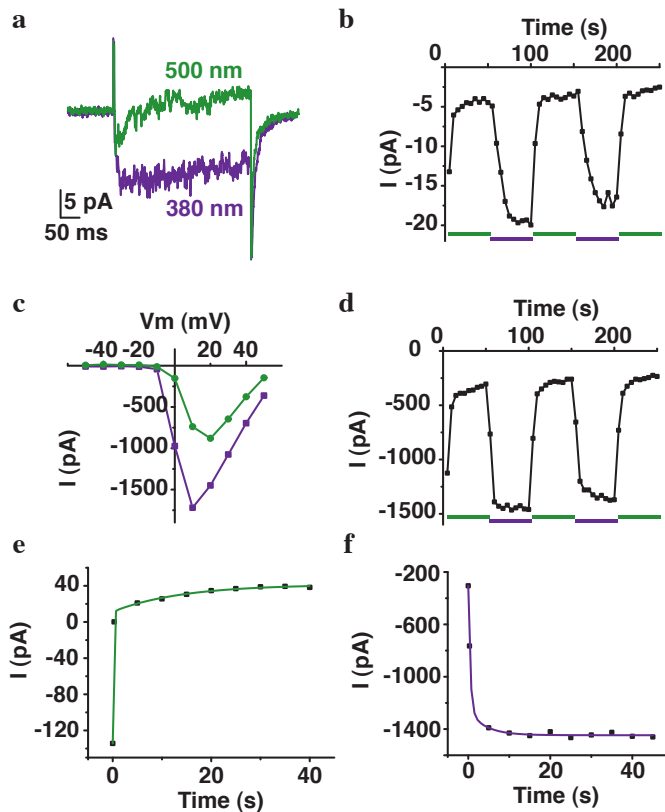

Whole-cell calcium current recording from GH3 cells, using 100  $\mu\text{M}$  QAQ in the pipette, showing (a) raw current traces ( $77.9 \pm 2.9$  % photoswitching  $\pm$  s.e.m.,  $n = 5$  cells) and (b) reversibility of block and unblock under both wavelength of light. Depolarization to +10 mV. Whole cell calcium current recording from HEK-293 cells stably expressing  $\text{Ca}_v2.2$ , using 100  $\mu\text{M}$  QAQ in the pipette, showing (c) I/V dependency and (d) reversibility of block and unblock. Depolarization to +10 mV. For both voltage-gated  $\text{Ca}^{2+}$  channels currents were measured using barium instead of calcium, to limit fast inactivation of the current. (e) Onset of block on  $\text{Ca}_v2.2$  after switching light to 500 nm. Current was fitted with a bi-exponential decay equation. For the fast process  $t_{1/2} = 187 \pm 57$  ms ( $n = 3$  cells). (f) Kinetics of unblock on  $\text{Ca}_v2.2$  after switching light to 380 nm. Current was fitted with a bi-exponential decay equation. For the fast process  $t_{1/2} = 270 \pm 30$  ms ( $n = 3$  cells).

**Supplementary Figure 6: QAQ photosensitizes various voltage-gated K<sup>+</sup> channels.**

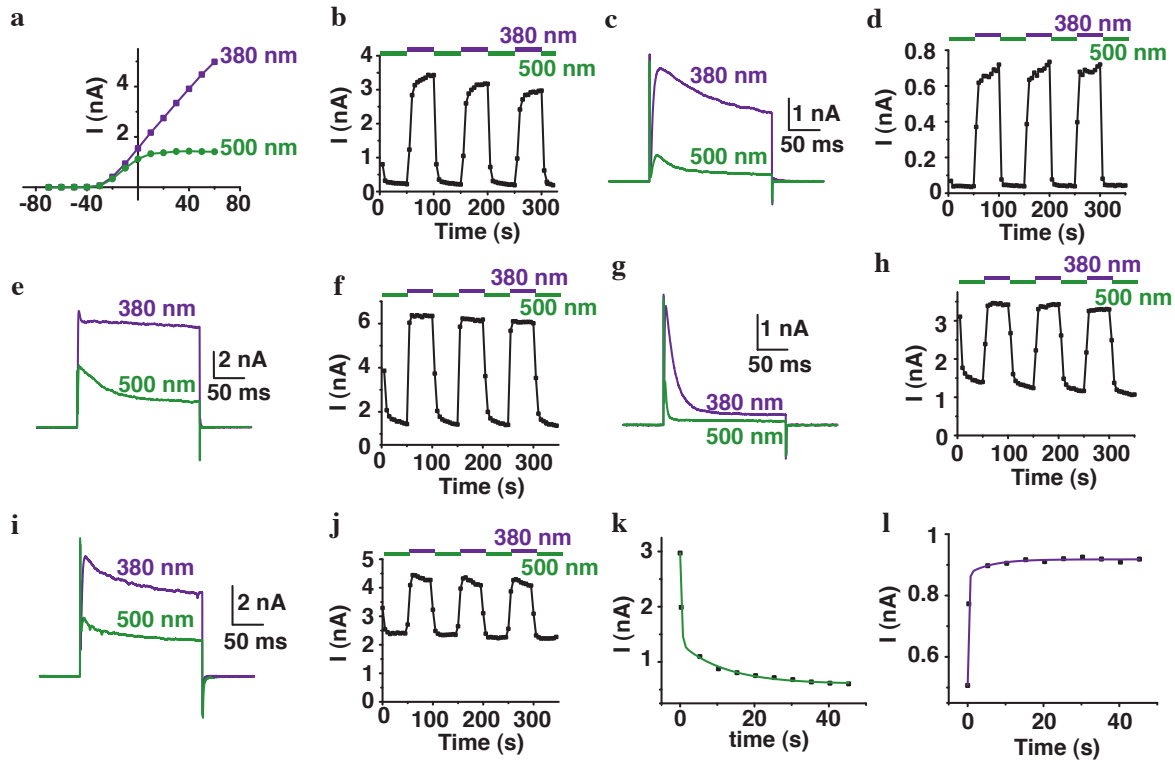

(a) I/V relationship for Shaker steady-state current under 380 and 500 nm light illumination, using 100  $\mu$ M QAQ in the patch pipette. (b) Reversibility of QAQ block for Shaker current, using 100  $\mu$ M QAQ in the pipette. (c), (e), (g) Whole cell current from HEK-293 cells transfected with K<sub>v</sub>2.1 ( $86.0 \pm 3.5$  % photoswitching  $\pm$  s.e.m.,  $n = 4$  cells), K<sub>v</sub>3.1 ( $46.6 \pm 13.4$  % photoswitching s.e.m.,  $n = 4$  cells) and K<sub>v</sub>4.2 ( $47.1 \pm 9.4$  % photoswitching s.e.m.,  $n = 4$  cells), respectively. (d), (f), (h) Reversibility of QAQ block on K<sub>v</sub>2.1, K<sub>v</sub>3.1 and K<sub>v</sub>4.2, respectively. (i) Whole cell potassium current from a hippocampal neuron using 100  $\mu$ M QAQ in the patch pipette ( $36.0 \pm 5.3$  % photoswitching  $\pm$  s.e.m.,  $n = 13$  cells). (j) Reversibility of QAQ block in a hippocampal neuron. For all recordings: depolarization from -70 to +40 mV. (k) Onset of block on Shaker after switching light to 500 nm. Current was fitted with a bi-exponential decay equation. For the fast process  $t_{1/2} = 201 \pm 20$  ms ( $n = 3$  cells). (l) Kinetics of unblock on Shaker-IR after switching light to 380 nm. Current was fitted with a bi-exponential decay equation. For the fast process  $t_{1/2} = 164 \pm 15$  ms ( $n = 3$  cells).

**Supplementary Figure 7: QAQ does not photosensitize  $K_{ir}$  or HCN channels.**

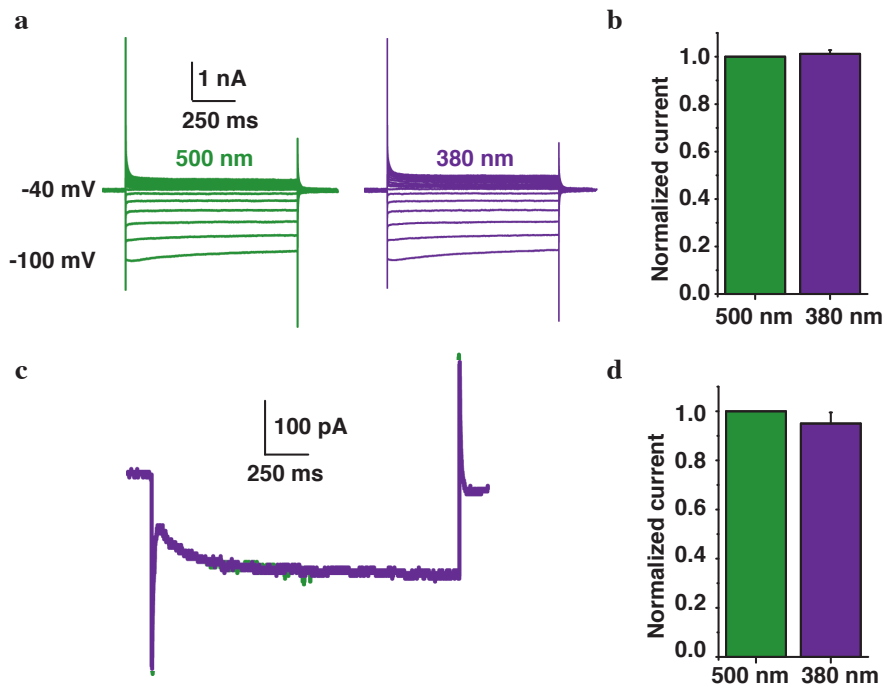

(a)  $K_{ir}$  currents were measured from HEK-293 cells transfected with  $K_{ir}$  2.1. Currents were elicited by voltage steps from -40 to -100 mV, in 10 mV increments, under illumination with 380 or 500 nm light. (b) Normalized current measured at -100 mV under both wavelengths of light ( $1.2 \pm 1.5$  % photoswitching,  $n = 5$  cells,  $p > 0.05$ ). (c) HCN currents were measured from acutely dissociated TG neurons upon hyperpolarization to -100 mV under 380 and 500 nm light. (d) Normalized current under both wavelengths of light ( $-5.2 \pm 4.7$  % photoswitching,  $n = 3$  cells,  $p > 0.05$ ). Error bars  $\pm$  s.e.m.; Student t-test.



**Supplementary Figure 8: QAQ does not photosensitize glutamate receptors.**

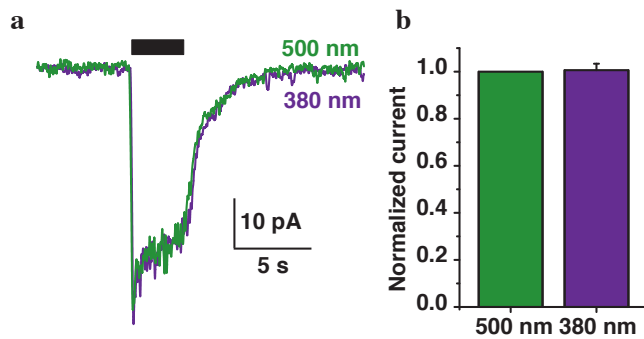

(a) Glutamate receptor currents were measured from hippocampal neurons in culture two days after plating. Extracellular solution is similar to  $K^+$  current recording solution without  $Mg^{2+}$ . The black bar represents perfusion of extracellular solution containing 100  $\mu M$  glutamate and 10  $\mu M$  glycine. Currents were measured under illumination with 380 or 500 nm light. (b) Normalized glutamate current under both wavelengths ( $0.6 \pm 2.6$  % photoswitching,  $n = 3$  cells,  $p > 0.05$  Student t-test). Error bars  $\pm$  s.e.m.

### Supplementary Figure 9: Neuronal survival after ATP and QAQ treatment.

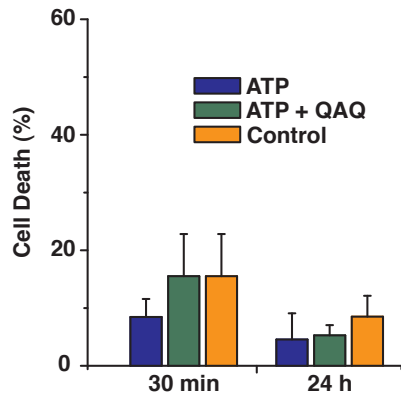

The Live/Dead assay was performed as described by Invitrogen (L-7013). Only dead cells were quantified by using DEAD Red. P2X<sub>7</sub> and GFP co-transfected hippocampal neurons were identified by green fluorescence. Cultured hippocampal neurons were transfected with P2X<sub>7</sub> (d7) and treated for 30 min with ATP (2.5 mM) +/- QAQ (100 μM), without external calcium, at d9-10. A Live/Dead Assay (Molecular Probes) was used to quantify cell survival among transfected cells, 30 minutes or 24 h after treatment. Both treatments did not cause toxicity compared to control (n = 11-18 fields of view, each field of view containing approximately 1-10 transfected cells; error bars ± s.e.m.).

**Supplementary Figure 10: QAQ photosensitizes second order neurons in spinal cord slices.**

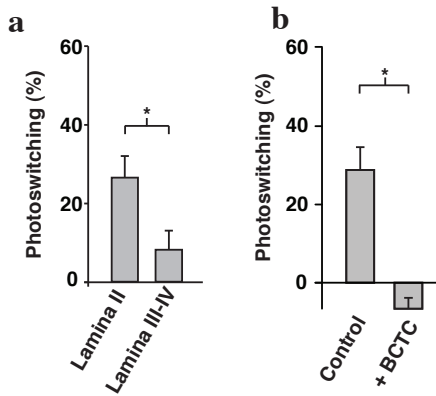

(a) Percent photoswitching for laminae II ( $26.5 \pm 5.0$  % photoswitching,  $n = 22$  cells) and III-IV neurons ( $8.2 \pm 4.9$  % photoswitching,  $n = 11$  cells,  $p < 0.05$ ). (b) Percent photoswitching for lamina II neurons with ( $6.6 \pm 3.0$  % photosensitization,  $n = 6$  cells) and without  $10 \mu\text{M}$  BCTC ( $26.5 \pm 5.0$  % photoswitching,  $n = 22$  cells,  $p < 0.05$ ). Error bars  $\pm$  s.e.m.; Student t-test.
